# Supplementary material for: Syngas production from electrocatalytic CO2 reduction with high energetic efficiency and current density
Source: Royal Society of Chemistry journal article supplement (doi:10.1039/c9ta01932d), 2019-01-01
Supplement: c9ta01932d1.pdf [file c9ta01932d1.pdf]

### Supplementary Figures

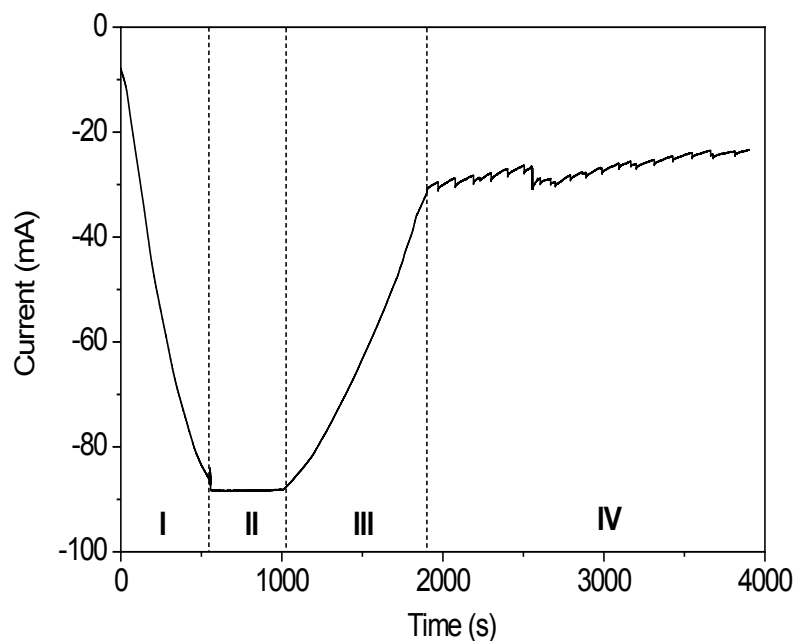

**Figure S1.** I-t curve for reduction of r-Cu<sub>ox</sub>(350) at  $-0.70$  V vs. RHE in  $0.1$  M KHCO<sub>3</sub>. Phase I indicates that reduction begins at the Cu<sub>ox</sub>(350) surface to the bulk; Phase II indicates the achievement of the maximum reductive current; Phase III indicates the end of reduction ; Phase IV indicates the beginning of HER.

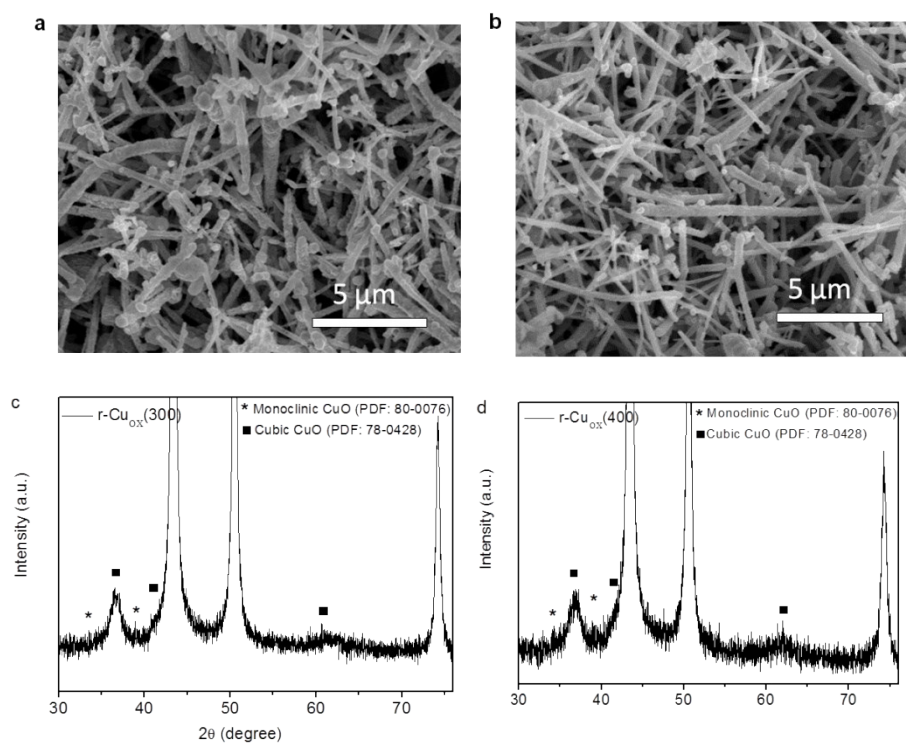

**Figure S2.** (a,b) SEM images and (c,d) XRD patterns of the r-CuOx(300) and r-CuOx(400) samples. Arrows in the panels indicate oxides species.

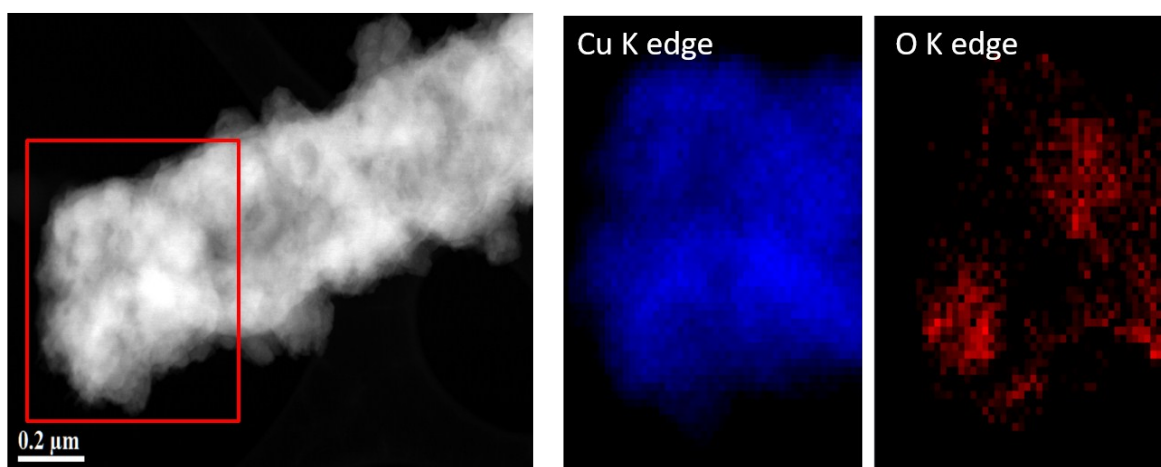

**Figure S3.** STEM image and corresponding electron energy loss spectroscopy mapping for the selected area.

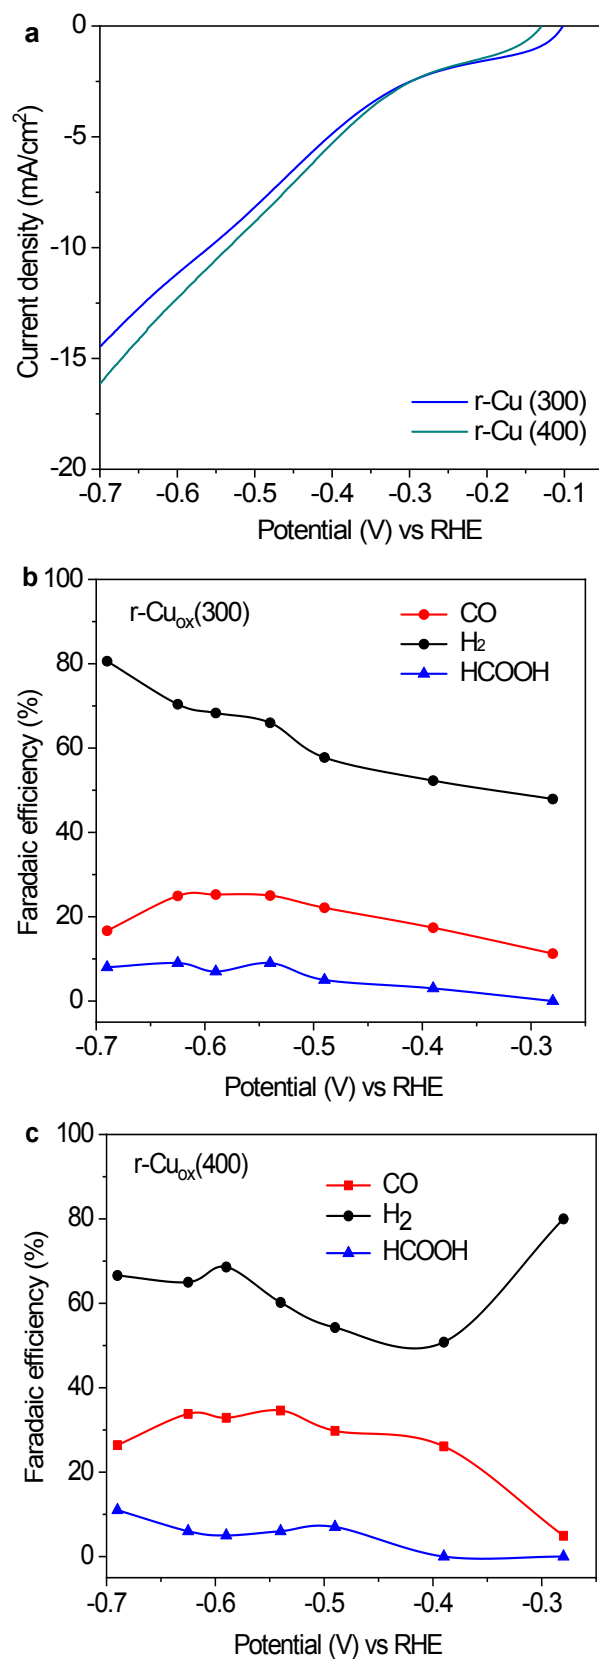

**Figure S4.** (a) Polarization curves and (b,c) F.E. of  $\text{CO}$ ,  $\text{H}_2$  and  $\text{HCOOH}$  as a function of the potential for the  $r\text{-Cu}_{\text{ox}}(300)$  and  $r\text{-Cu}_{\text{ox}}(400)$  samples in  $\text{CO}_2$ -saturated  $0.1 \text{ M KHCO}_3$  solutions.

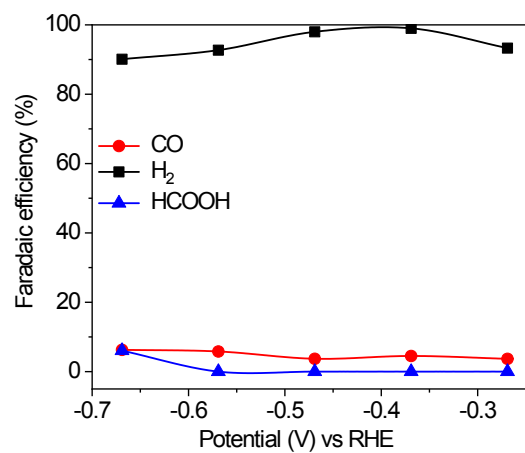

**Figure S5.** F.E. of CO, H<sub>2</sub> and HCOOH as a function of the potential for pristine Cu sample.

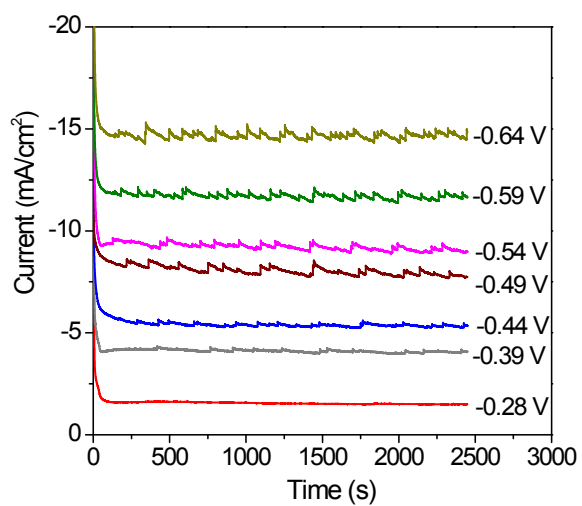

**Figure S6.** Current densities of the catalyst over 40 min operation at different potentials.

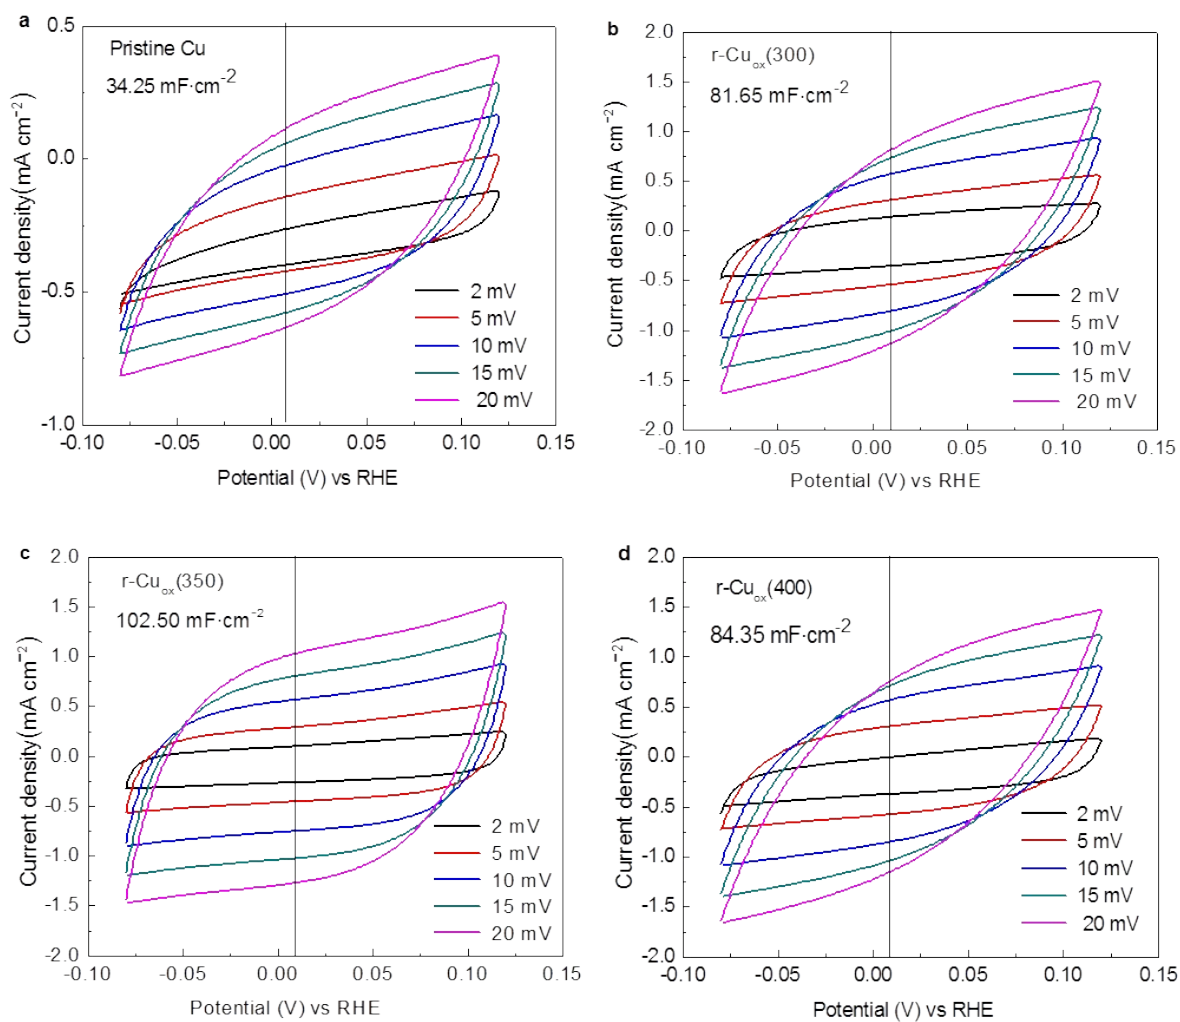

**Figure S7.** (a-d) Cyclic voltammetry curves for the pristine Cu, r-Cu<sub>ox</sub>(300), r-Cu<sub>ox</sub>(350) and r-Cu<sub>ox</sub>(400) catalysts in the potential range, in which Faradaic processes are not occurring in 0.1 M KHCO<sub>3</sub> electrolyte.

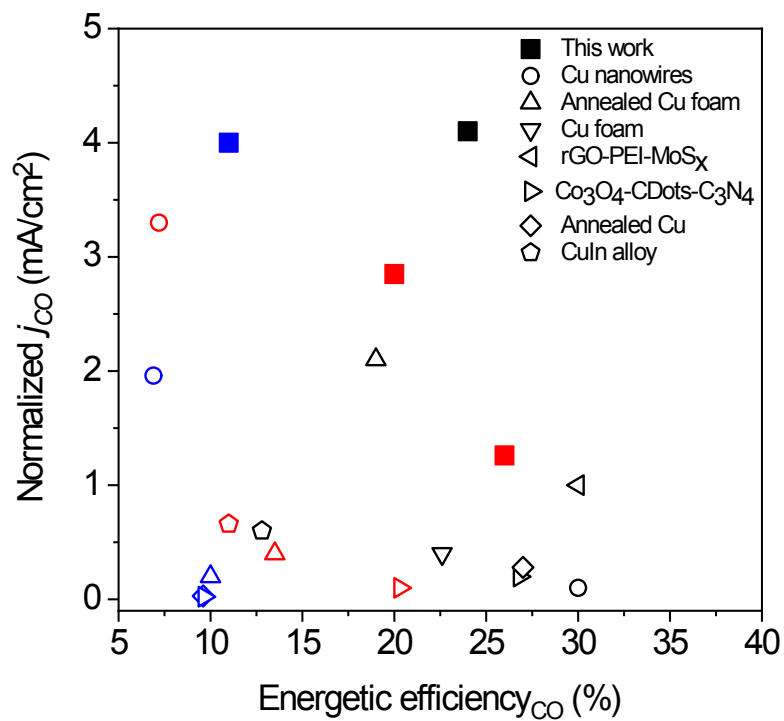

**Figure S8.** Comparison of E.E.<sub>CO</sub> and  $j_{CO}$  for r-Cu<sub>ox</sub>(350) with other reported syngas generation electrocatalysts. The symbols in black, red and blue stand for the syngas with H<sub>2</sub>/CO ratio of 1, 2 and 3, respectively. The details are provided in Table S2.

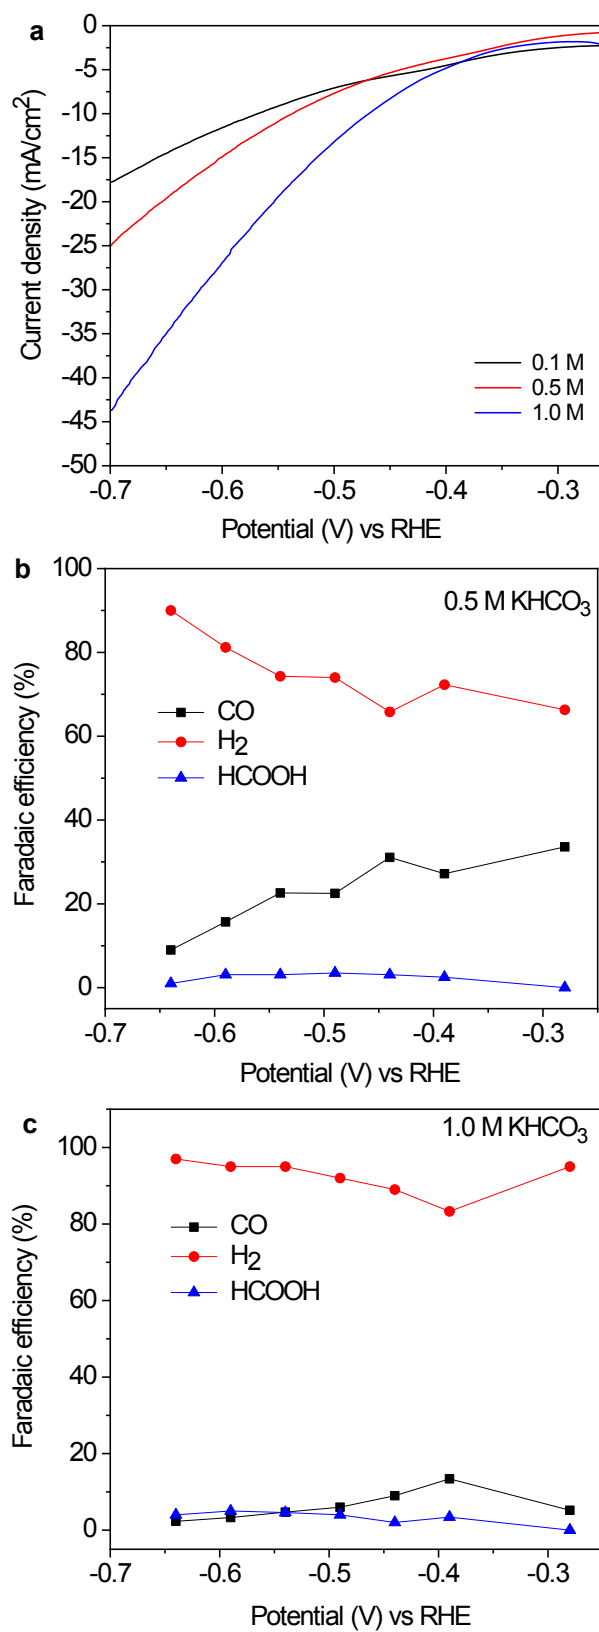

**Figure S9.** (a) Polarization curves and (b, c) F.E. of CO, H<sub>2</sub> and HCOOH as a function of the potential for r-Cu<sub>ox</sub>(350) at different concentrations of CO<sub>2</sub>-saturated KHCO<sub>3</sub> solutions.

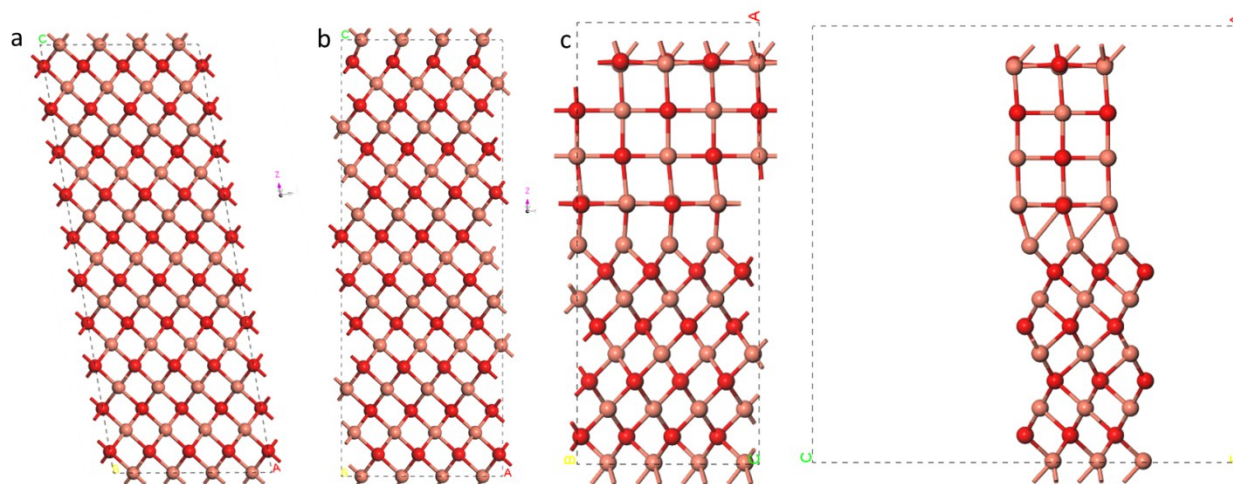

**Figure S10.** (a,b) m-CuO  $2\times 1\times 5$  supercell before and after reconstruction. (c) top view (left) and side view (right) of the constructed CuO-heterostructure. Colour code: pink, copper; red, oxygen.

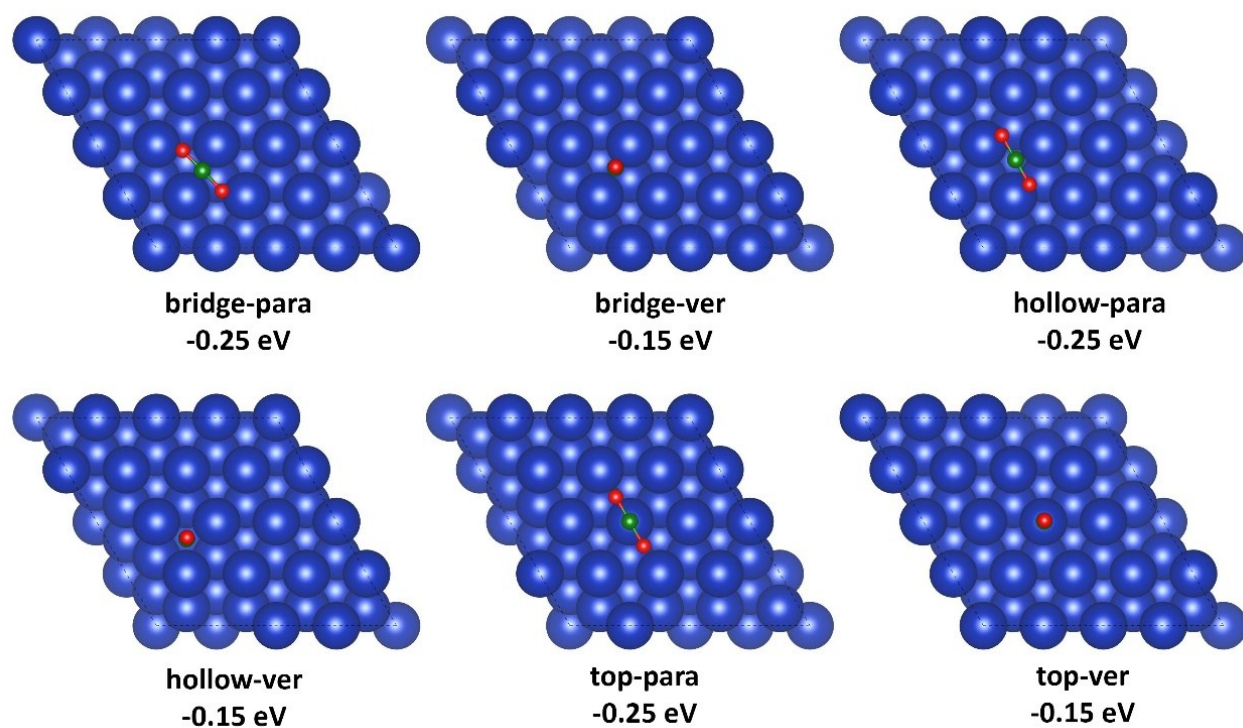

**Figure S11.** Different CO<sub>2</sub> adsorption configurations on the Cu(111) surface. For each optimized structure, the starting configuration is described as 'adsorption position-CO<sub>2</sub> orientation'. Colour code: blue, copper; red, oxygen in CuO; orange, oxygen in adsorbate; green, carbon; white, hydrogen.



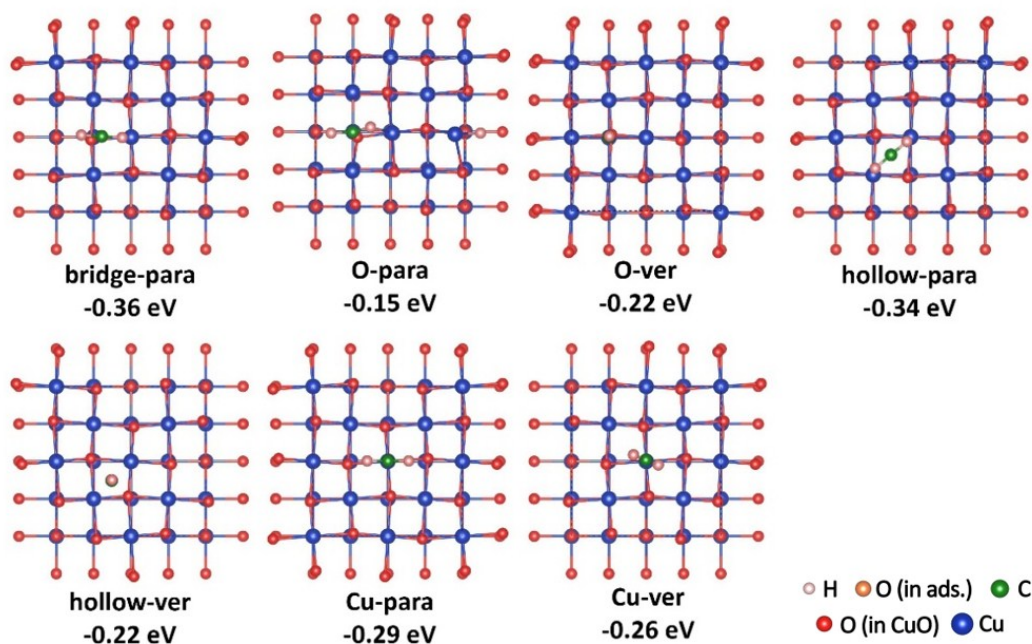

**Figure S12.** Different CO<sub>2</sub> adsorption configurations on the c-CuO(001) surface. For each optimized structure, the starting configuration is described as 'adsorption position-CO<sub>2</sub> orientation'.

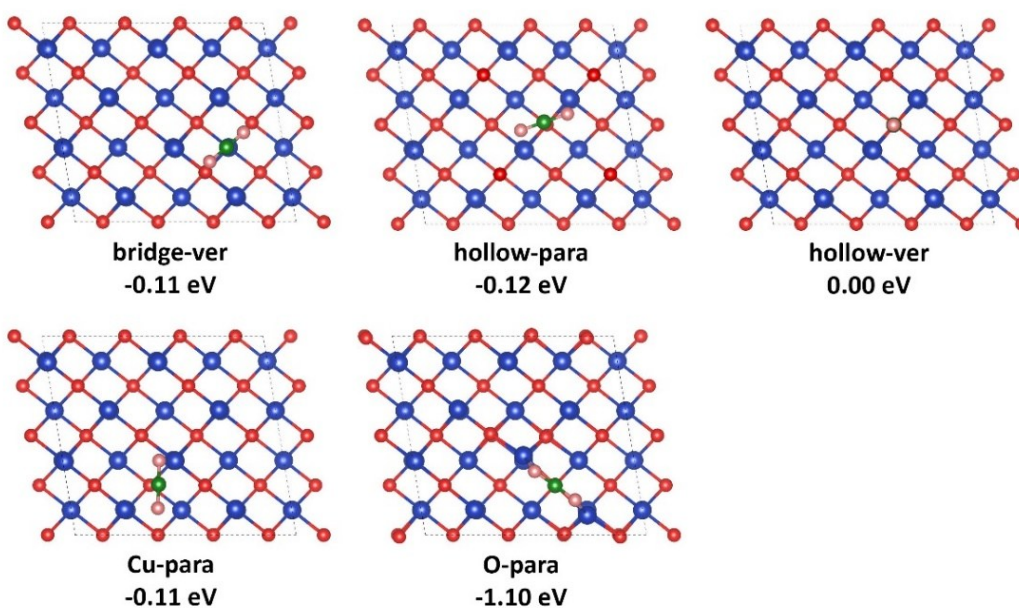

**Figure S13.** Different CO<sub>2</sub> adsorption configurations on the m-CuO(010) surface. For each optimized structure, the starting configuration is described as 'adsorption position-CO<sub>2</sub> orientation'. For this monoclinic structure, geometry optimization of standalone substrate did not succeed; therefore, the substrate energy is defined using the weakest CO<sub>2</sub> adsorption configuration (the 'hollow-ver' configuration). Color code as in Figure S12.

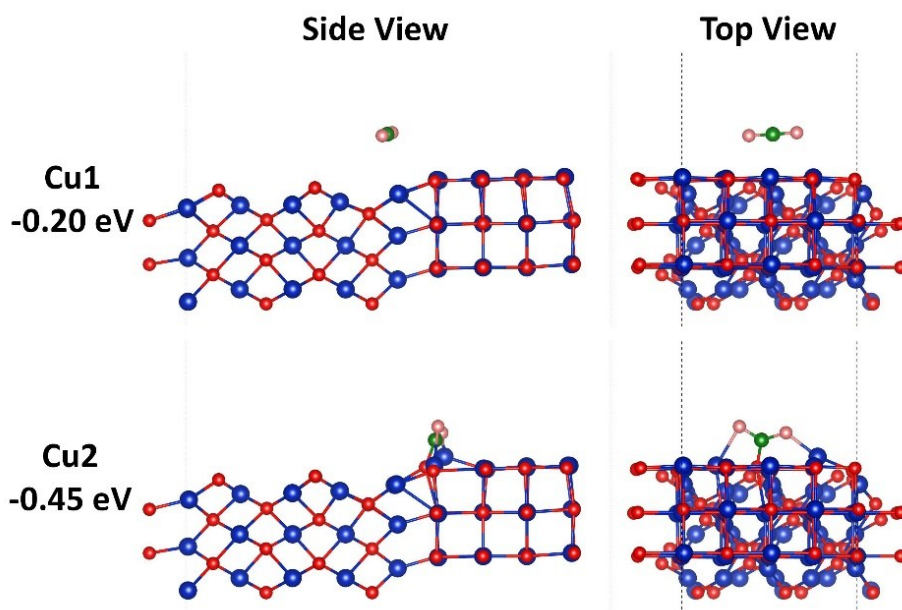

**Figure S14.** Different CO<sub>2</sub> adsorption configurations on the CuO-heterostructure. For each optimized structure, the starting configuration is described as 'adsorption position'. Color code as in Figure S12.

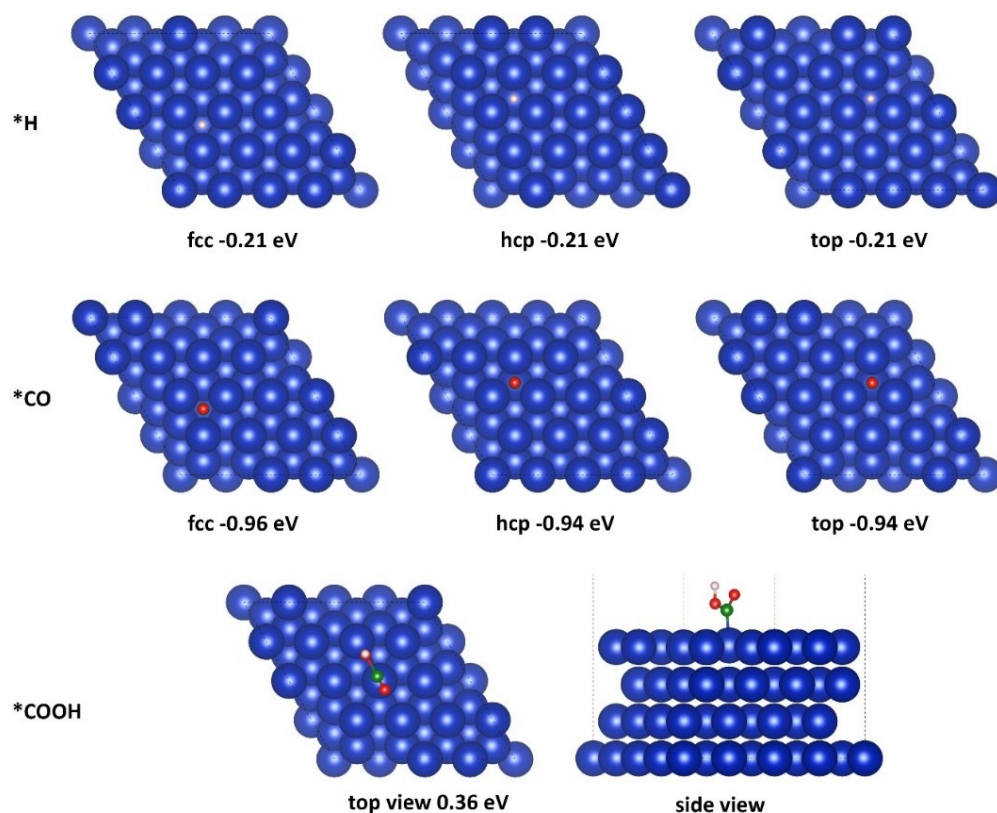

**Figure S15.** Different configurations of adsorption of reaction intermediates on Cu(111). Color code as in Figure S12.

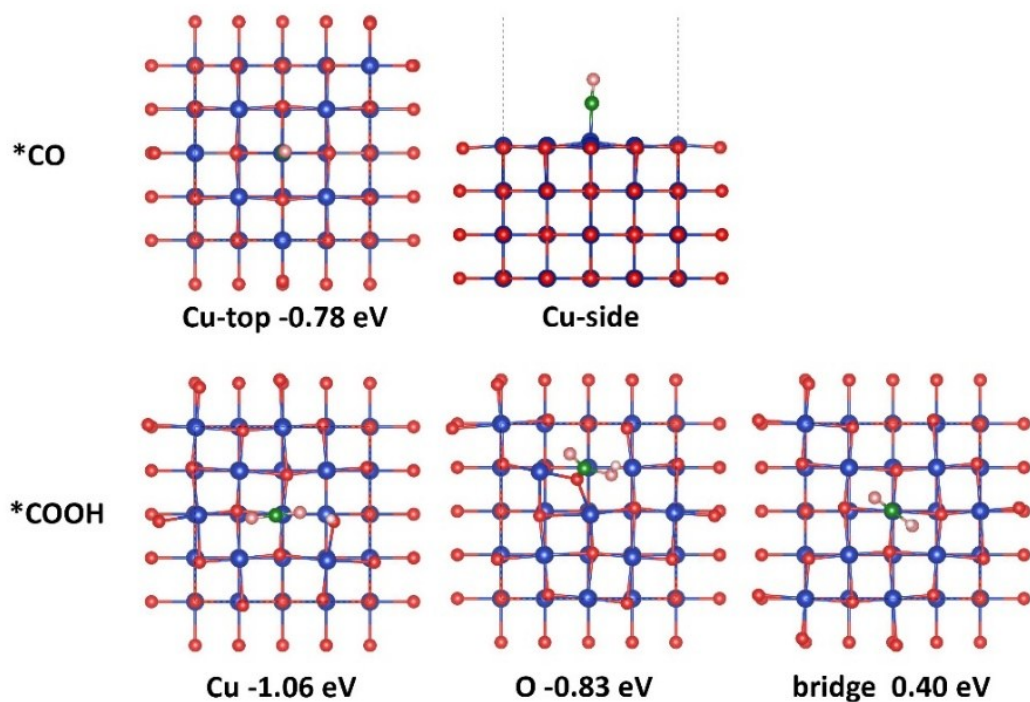

**Figure S16.** Different configurations of adsorption of reaction intermediates on the c-CuO(001) surface. Color code as in Figure S12.

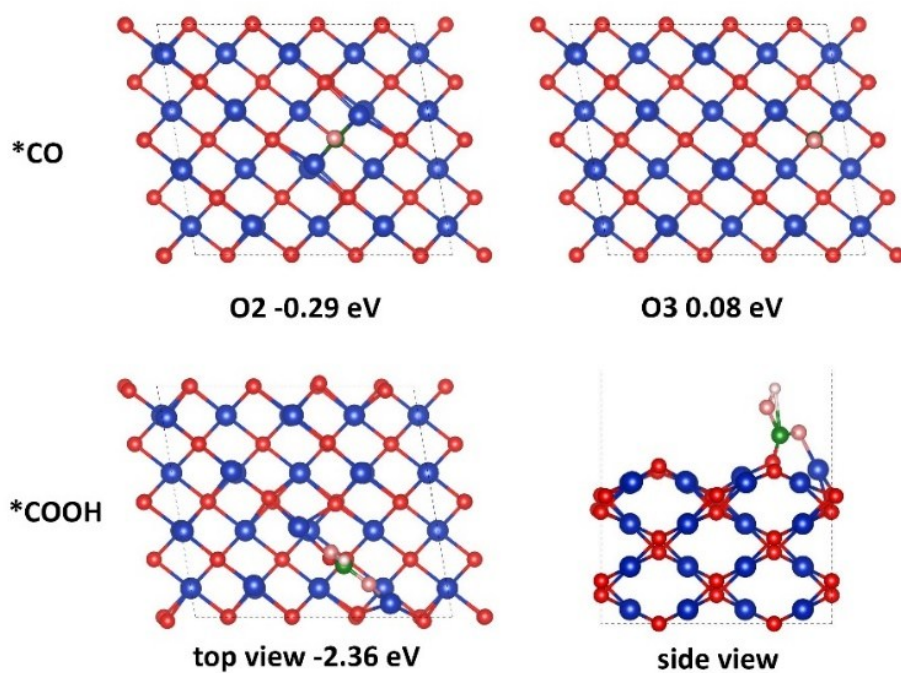

**Figure S17.** Different configurations of adsorption of reaction intermediates on the m-CuO(010) surface. Color code as in Figure S12.



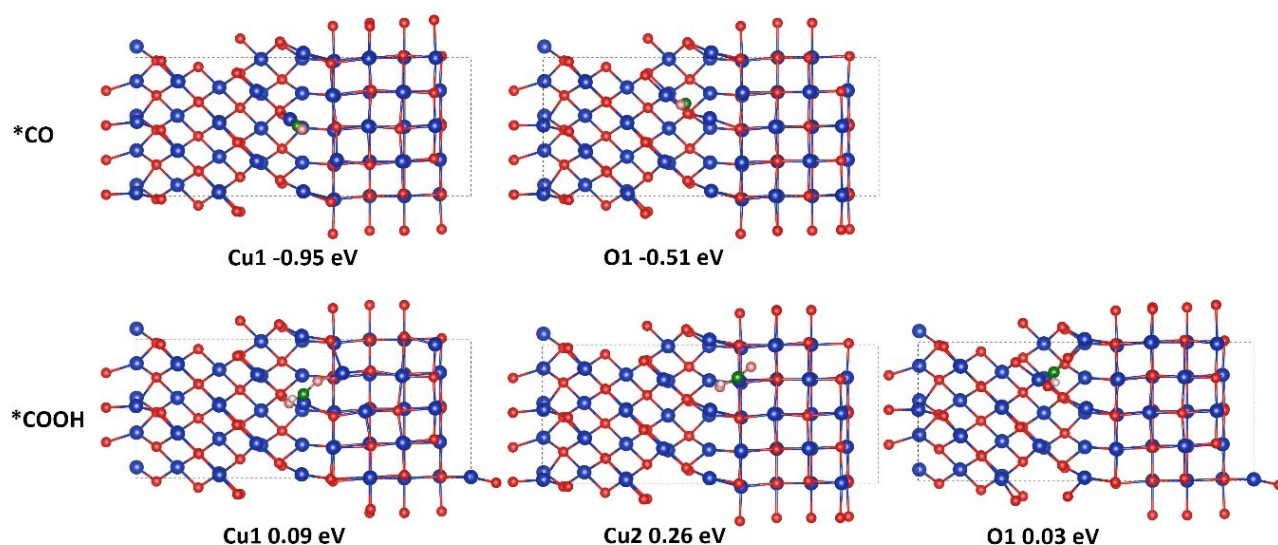

**Figure S18.** Different configurations of adsorption of reaction intermediates on the CuO-heterostructure. Color as in Figure S12.

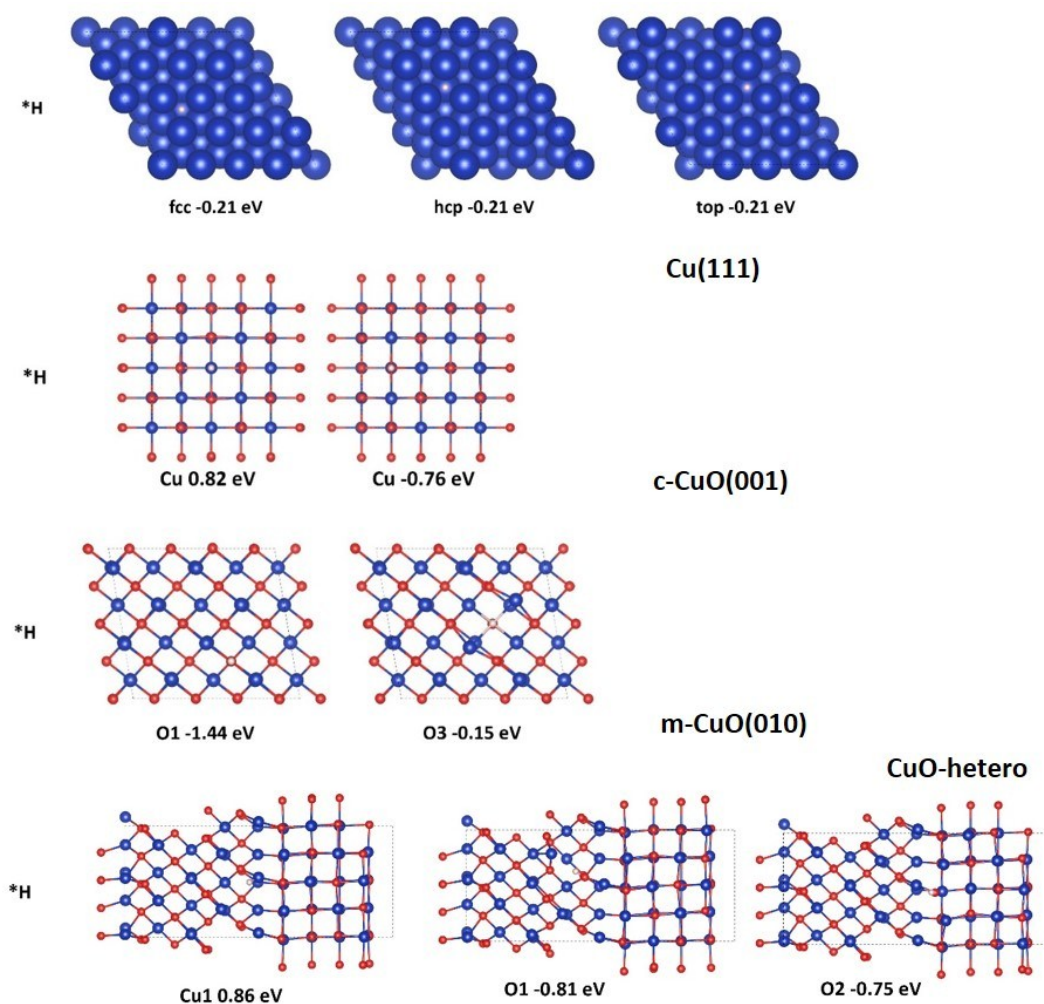

**Figure S19.** H\* adsorption on different surfaces. Color code as in Figure S12.

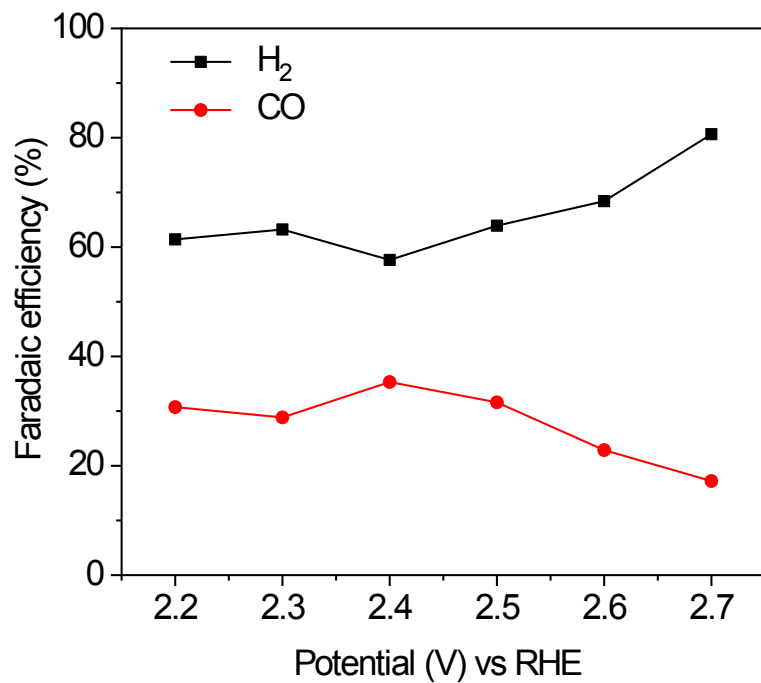

**Figure S20.** F.E. of CO and H<sub>2</sub> on r-Cu<sub>ox</sub>(350) as a function of the applied voltage.

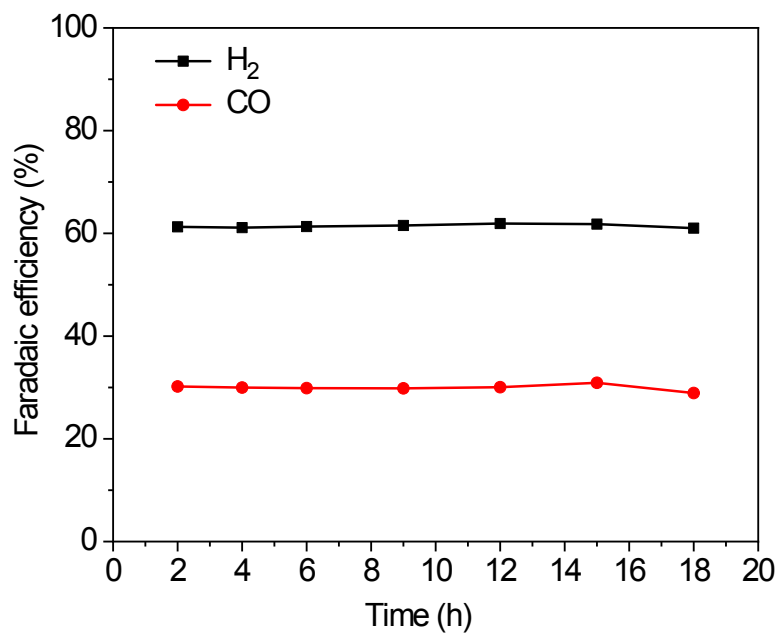

**Figure S21.** F.E. of CO and H<sub>2</sub> on r-Cu<sub>ox</sub>(350) as a function of time under applied voltage of 2.2 V.

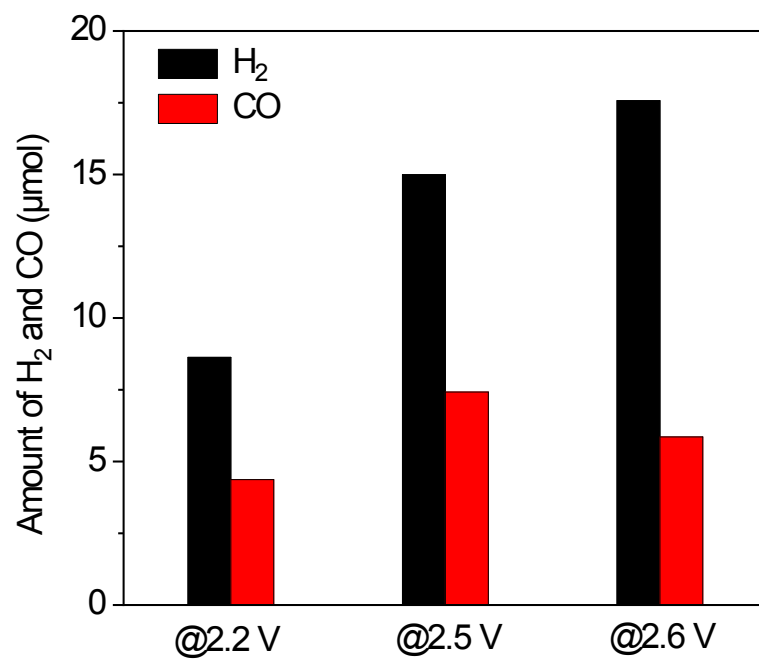

**Figure S22.** Amount of generated CO and H<sub>2</sub> using the different solar cell potentials during a 30 min electrolysis.

## Supplementary Methods

### Computation Models

Three bulk models were constructed in this study: Cu, cubic-CuO, and monoclinic-CuO. The corresponding lattice parameters for these bulk materials were optimized to  $3.547 \text{ \AA} \times 3.547 \text{ \AA} \times 3.547 \text{ \AA}$  ( $\alpha=\beta=\gamma=90^\circ$ ),  $4.226 \text{ \AA} \times 4.226 \text{ \AA} \times 4.226 \text{ \AA}$  ( $\alpha=\beta=\gamma=90^\circ$ ), and  $4.720 \text{ \AA} \times 3.459 \text{ \AA} \times 5.181 \text{ \AA}$  ( $\alpha=\gamma=90^\circ$ ,  $\beta=99.5^\circ$ ), respectively. Afterwards the surface of each bulk material was cleaved to match experimental observation of this work, as outlined in Figure 2, which are Cu(111), c-CuO(001), and m-CuO(010). The construction of heterostructure was conducted in the following way. First, a  $(2 \times 1 \times 5)$  m-CuO supercell (Figure S11a) was reconstructed to a cubic structure (Figure S11b) with a lattice parameter of  $9.44 \text{ \AA} \times 3.46 \text{ \AA} \times 25.55 \text{ \AA}$ . Afterwards, the lattice of this reconstructed m-CuO supercell in *a* and *b* direction was slightly adjusted to match that of a  $(2 \times 1 \times 2)$  c-CuO supercell, which is  $8.45 \text{ \AA} \times 4.23 \text{ \AA} \times 8.45 \text{ \AA}$ . Subsequently, bottom ten layers of the reconstructed m-CuO were selected to construct the heterostructure. Lastly, this periodic heterostructure was cleaved in (010) direction to construct a slab with about 15 Å vacuum space in between, as shown in Figure S11c. The length of this supercell along heterojunction direction is then further optimized to 20.47 Å.

The reaction intermediate states considered in this study include CO<sub>2</sub> adsorption, \*COOH, \*CO, and \*H. Based on these calculations, the free energy diagram for two products, CO and H<sub>2</sub>, can be summarized. The adsorption energy of CO<sub>2</sub> is defined as

$$E_{\text{ad}} = E_{\text{total}} - (E_{\text{substrate}} + E_{\text{CO}_2})$$

where  $E_{\text{total}}$  is the total energy of the system with adsorbed CO<sub>2</sub>,  $E_{\text{substrate}}$  and  $E_{\text{CO}_2}$  are the energy of substrate and isolated CO<sub>2</sub>, respectively. The adsorption energy of adsorbed states, including \*COOH, \*CO, and \*H are defined using gas phase energy as a reference (see below):

$$E_{*\text{COOH}} = E_{\text{total}} - (E_{\text{substrate}} + E_{\text{HCOOH}} - \frac{1}{2} E_{\text{H}_2})$$

$$E_{*\text{CO}} = E_{\text{total}} - (E_{\text{substrate}} + E_{\text{CO}})$$

$$E_{*\text{H}} = E_{\text{total}} - (E_{\text{substrate}} + \frac{1}{2} E_{\text{H}_2})$$

## Supplementary Tables

**Table S1.** Cu K-edge EXAFS fitting results for pristine Cu, Cu350 and Cu foil.

|             |       | coordination number | Bond length | $\sigma^2(10^{-3}\text{\AA}^2)$ |
|-------------|-------|---------------------|-------------|---------------------------------|
| Pristine Cu | Cu-Cu | 5.9                 | 2.55        | 9.3                             |
| Cu350       | Cu-O  | 2.1                 | 1.84        | 4.6                             |
|             | Cu-Cu | 5.7                 | 2.55        | 9.6                             |
| Cu foil     | Cu-Cu | 12                  | 2.54        | 9.1                             |



**Table S2** Comparison of the potential (V vs RHE),  $EE_{CO}$  (%) and  $j_{CO}$  (mA/cm<sup>2</sup>) for different electrocatalysts and desired syngas with H<sub>2</sub>/CO ratio of 1/1, 2/1 and 3/1. The labels are the same as those in Fig. S8.

|   | Catalyst                                                            | Potential (V vs RHE) | $EE_{CO}$ (%) | $j_{CO}$ (mA/cm <sup>2</sup> ) | H <sub>2</sub> /CO | Ref.      |
|---|---------------------------------------------------------------------|----------------------|---------------|--------------------------------|--------------------|-----------|
| ■ | r-Cu <sub>ox</sub> (350)                                            | -0.49                | 24            | 4.10                           | 1/1                | This work |
| ○ | Cu nanowires                                                        | -0.23                | 30            | 0.10                           | 1/1                | [1]       |
| △ | Annealed Cu foam                                                    | -0.45                | 19            | 2.10                           | 1/1                | [2]       |
| ▽ | Cu foam (20s)                                                       | -0.50                | 22.6          | 0.40                           | 1/1                | [3]       |
| ◁ | rGO-PEI-MOSx                                                        | -0.45                | 30            | 1.00                           | 1/1                | [4]       |
| ▷ | Co <sub>3</sub> O <sub>4</sub> -CDots-C <sub>3</sub> N <sub>4</sub> | -0.45                | 26.8          | 0.20                           | 1/1                | [5]       |
| ◊ | Annealed Cu                                                         | -0.35                | 27            | 0.28                           | 1/1                | [6]       |
| ◑ | CuIn alloy                                                          | -1.00                | 12.8          | 0.60                           | 1/1                | [7]       |
| ■ | r-Cu <sub>ox</sub> (350)                                            | -0.28                | 26            | 1.26                           | 2/1                | This work |
| ■ | r-Cu <sub>ox</sub> (350)                                            | -0.39                | 20            | 2.85                           | 2/1                | This work |
| ★ | Pd/C                                                                | -0.50                | 18.1          | 0.10                           | 2/1                | [8]       |
| △ | Annealed Cu foam                                                    | -0.34                | 13.5          | 0.40                           | 2/1                | [2]       |
| ○ | Cu nanowires                                                        | -0.58                | 7.2           | 3.30                           | 2/1                | [1]       |
| ◑ | CuIn alloy                                                          | -0.10                | 11            | 0.66                           | 2/1                | [7]       |
| ▷ | Co <sub>3</sub> O <sub>4</sub> -CDots-C <sub>3</sub> N <sub>4</sub> | -0.40                | 20.3          | 0.10                           | 2/1                | [5]       |
| ■ | r-Cu <sub>ox</sub> (350)                                            | -0.64                | 11            | 4.00                           | 3/1                | This work |
| ★ | Pd/C                                                                | -0.80                | 19            | 0.30                           | 3/1                | [8]       |
| ○ | Cu nanowires                                                        | 0.64                 | 6.9           | 1.96                           | 3/1                | [1]       |
| ▷ | Co <sub>3</sub> O <sub>4</sub> -CDots-C <sub>3</sub> N <sub>4</sub> | -0.35                | 9.6           | 0.03                           | 3/1                | [5]       |
| ◊ | Annealed Cu                                                         | -0.20                | 9.65          | 0.02                           | 3/1                | [6]       |
| △ | Annealed Cu foam                                                    | -0.28                | 10            | 0.20                           | 3/1                | [2]       |

**Table S3.** Frequencies and thermodynamic energy corrections for different adsorbates involved in CO<sub>2</sub>RR and HER.

| Adsorbate | Frequencies (meV)                                                 | ZPE (eV) | $\int C_p dT$ (eV) | -TS (eV) |
|-----------|-------------------------------------------------------------------|----------|--------------------|----------|
| *CO       | 225.76, 35.11, 29.04, 28.46, 16.60, 13.87                         | 0.17     | 0.08               | -0.15    |
| *COOH     | 433.31, 209.12, 147.18, 115.31, 75.28, 74.10, 42.15, 28.58, 21.27 | 0.57     | 0.05               | -0.08    |
| *H        | 135.73, 101.86, 99.73                                             | 0.17     | 0.00               | -0.01    |

**Table S4.** Frequencies and thermodynamic energy corrections for gas phase molecules.

| Adsorbate       | Frequencies (meV)                                                    | ZPE (eV) | $\int C_p dT$ (eV) | -TS (eV) |
|-----------------|----------------------------------------------------------------------|----------|--------------------|----------|
| CO              | 263.60                                                               | 0.13     | 0.10               | -0.61    |
| CO <sub>2</sub> | 293.15, 163.49, 78.49, 78.37                                         | 0.31     | 0.11               | -0.66    |
| HCOOH           | 448.89, 370.22, 218.52, 167.58, 155.83, 132.89, 123.42, 83.58, 73.98 | 0.89     | 0.11               | -0.50    |
| H <sub>2</sub>  | 536.62                                                               | 0.27     | 0.10               | -0.42    |

## References

- [1] D. Raciti, K. J. Livi, C. Wang, Nano Letters 2015, 15, 6829.
- [2] S. X. Min, X. L. Yang, A. Y. Lu, C. C. Tseng, M. N. Hedhili, L. J. Li, K. W. Huang, Nano Energy 2016, 27, 121.
- [3] A. Dutta, M. Rahaman, N. C. Luedi, P. Broekmann, Acs Catalysis 2016, 6, 3804.
- [4] F. Li, S.-F. Zhao, L. Chen, A. Khan, D. R. MacFarlane, J. Zhang, Energy & Environmental Science 2016, 9, 216.
- [5] S. J. Guo, S. Q. Zhao, X. Q. Wu, H. Li, Y. J. Zhou, C. Zhu, N. J. Yang, X. Jiang, J. Gao, L. Bai, Y. Liu, Y. Lifshitz, S. T. Lee, Z. H. Kang, Nature Communications 2017, 8: 1828.
- [6] C. W. Li, M. W. Kanan, Journal of the American Chemical Society 2012, 134, 7231.
- [7] Z. B. Hoffman, T. S. Gray, K. B. Moraveck, T. B. Gunnoe, G. Zangari, Acs Catalysis 2017, 7, 5381.
- [8] W. C. Sheng, S. Kattel, S. Y. Yao, B. H. Yan, Z. X. Liang, C. J. Hawxhurst, Q. Y. Wu, J. G. G. Chen, Energy & Environmental Science 2017, 10, 1180.
